# Supplementary material
Source: PubMed Central journal article supplement (PMC6981059)
Supplement: NIHMS1540867-supplement-1.pdf [file NIHMS1540867-supplement-1.pdf]

**Differential effects of diet and weight on taste responses in diet-induced obese mice**

Zachary C. Ahart<sup>1</sup>, Laura E. Martin<sup>2</sup>, Bailey R. Kemp<sup>1</sup>, Debarghya Dutta Banik<sup>1</sup>, Stefan G.E. Roberts<sup>1,3</sup>, Ann-Marie Torregrossa<sup>2\*</sup> and Kathryn F Medler<sup>1\*</sup>

<sup>1</sup>Department of Biological Sciences, University at Buffalo, The State University of New York, Buffalo, New York, USA <sup>2</sup>Department of Psychology, University at Buffalo, The State University of New York, Buffalo, New York, USA <sup>3</sup>School of Cellular and Molecular Medicine, University of Bristol, Bristol BS8 1TD, UK

Direct correspondence to:

Kathryn Medler

[kmedler@buffalo.edu](mailto:kmedler@buffalo.edu)

| Primer        | Annealing Temperature | Sequence                                                               |
|---------------|-----------------------|------------------------------------------------------------------------|
| GAPDH (5'-3') | 55°C                  | FP: AGC CTC GTC CCG TAG ACA AAA T<br>RP: CCG TGA GTG GAG TCA TAC TGG A |
| PLCβ2 (5'-3') | 60°C                  | FP: TTC TAG GCT GCA TCT TGG GC<br>RP: CAA TTG AGG GGC AGC TGA GA       |
| Gustducin     | 58.4°C                | FP:CCTCACCTGTTTAAACAGCATATGTAATCA<br>RP:CCTTAGCCACTTTCTCCTGGAA         |

**Table S1.** Real time primers sequences.

| Exp cond | AceK test | AceK resp | Sac test | Sac resp | Suc test | Suc resp | Den test | Den resp | KCl test | KCl resp |
|----------|-----------|-----------|----------|----------|----------|----------|----------|----------|----------|----------|
| HF       | 150       | 10        | 152      | 27       | 169      | 13       | 172      | 23       | 166      | 16       |
| CTL      | 80        | 11        | 72       | 25       | 80       | 10       | 80       | 22       | 80       | 12       |
| HF+CAP   | 108       | 13        | 94       | 19       | 100      | 12       | 108      | 19       | 108      | 9        |
| CTL+CAP  | 72        | 7         | 84       | 26       | 74       | 7        | 86       | 37       | 86       | 16       |

**Table S2.** Raw data for taste cell responsiveness. The total number of cells tested and responses for each stimulus for each experimental condition is shown. Amplitude responses in Figures 2 and 3 were calculated from the responding cells in each condition and stimulus.

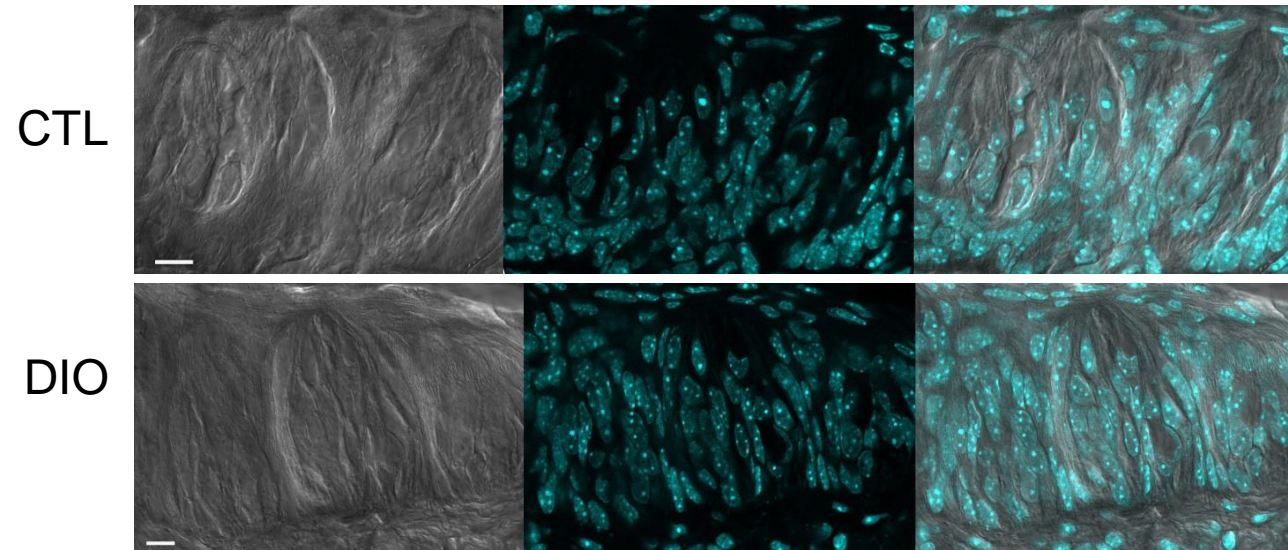

**Figure S1: DIO does not affect taste cell number.** TRCs in control and DIO mice were counted using DAPI staining to label individual TRCs. Representative images are shown. Scale bar=20 $\mu$ m.

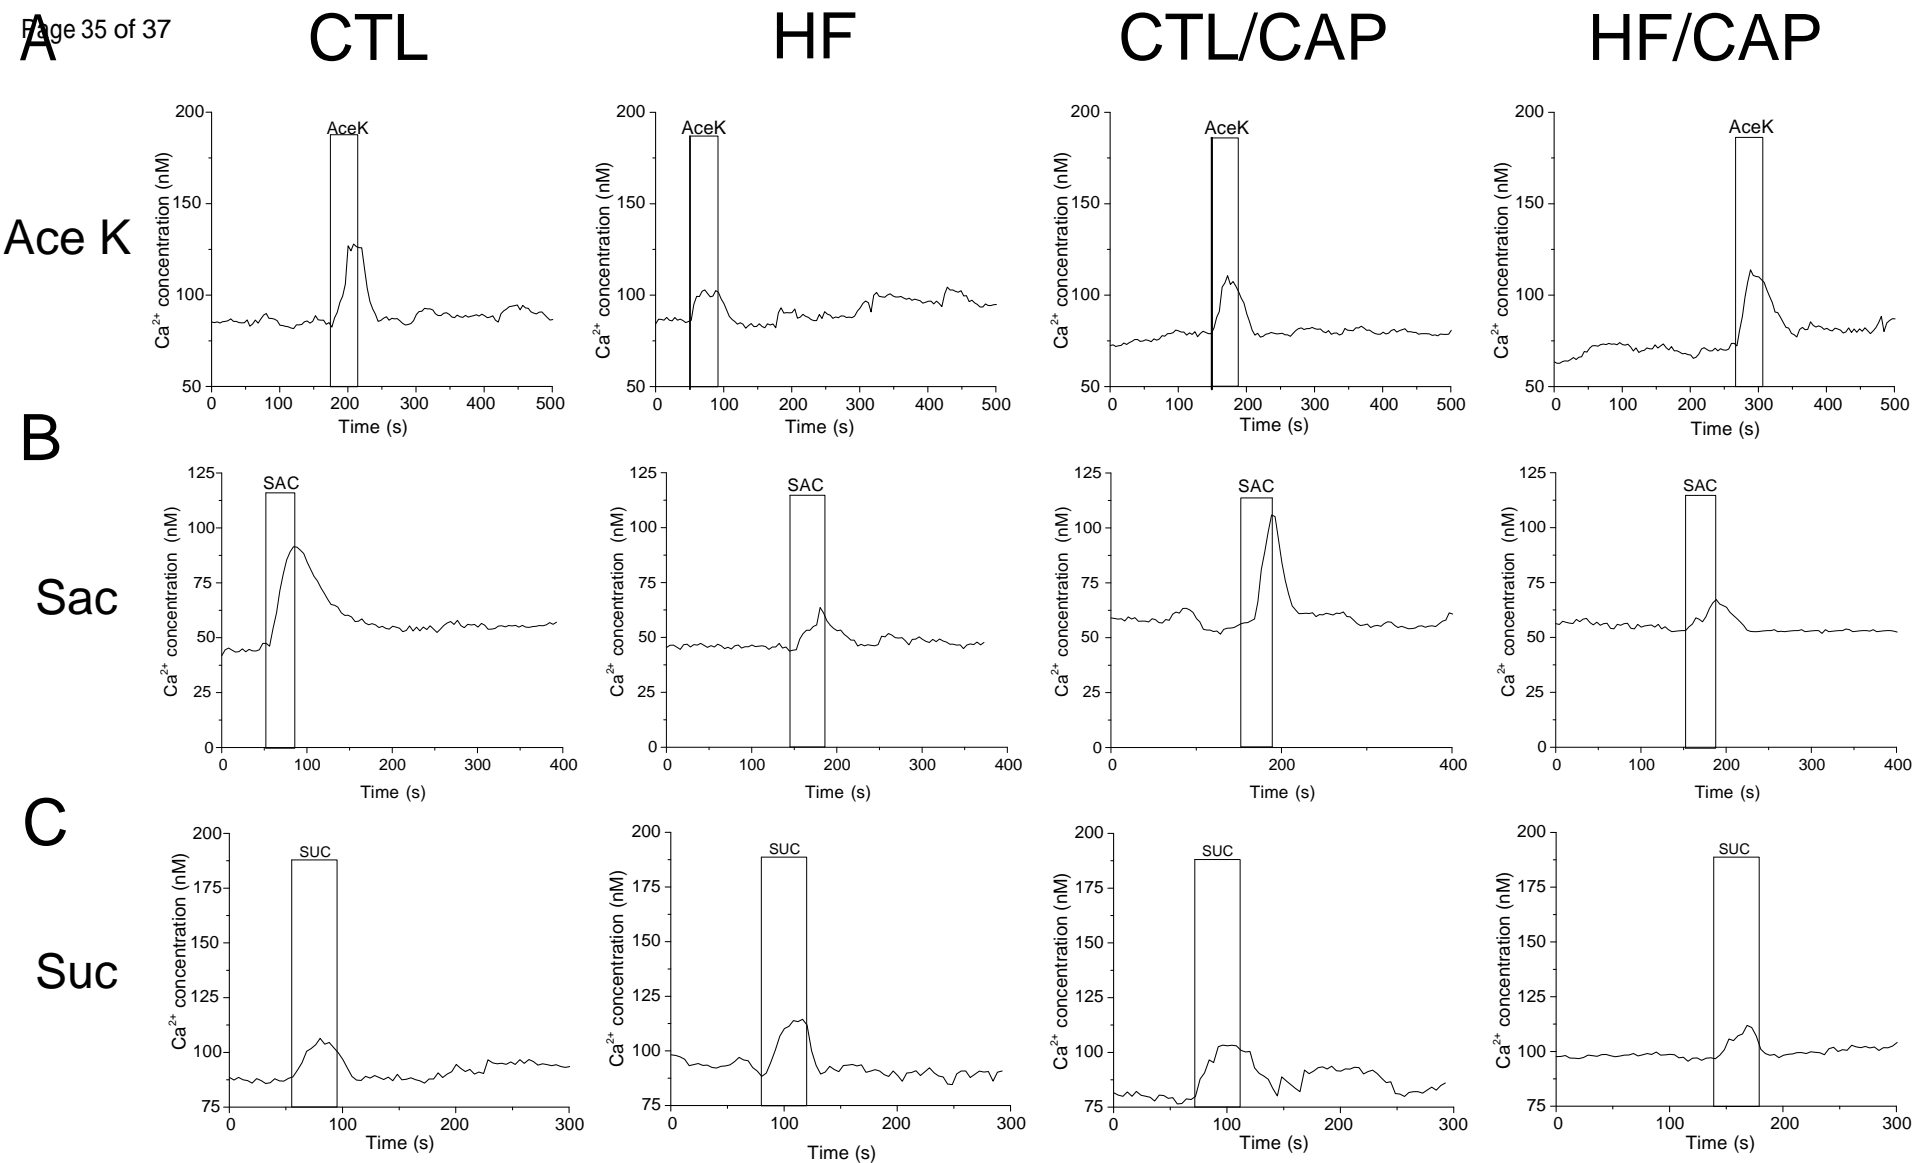

**Figure S2: Sweet evoked responses are affected by diet and weight.** Representative live cell imaging traces of TRCs that were stimulated with (A) aceK, (B) saccharin, or (C) sucrose from CTL (first column), HF (second column), CTL/CAP (third column) or HF/CAP (fourth column) mice.

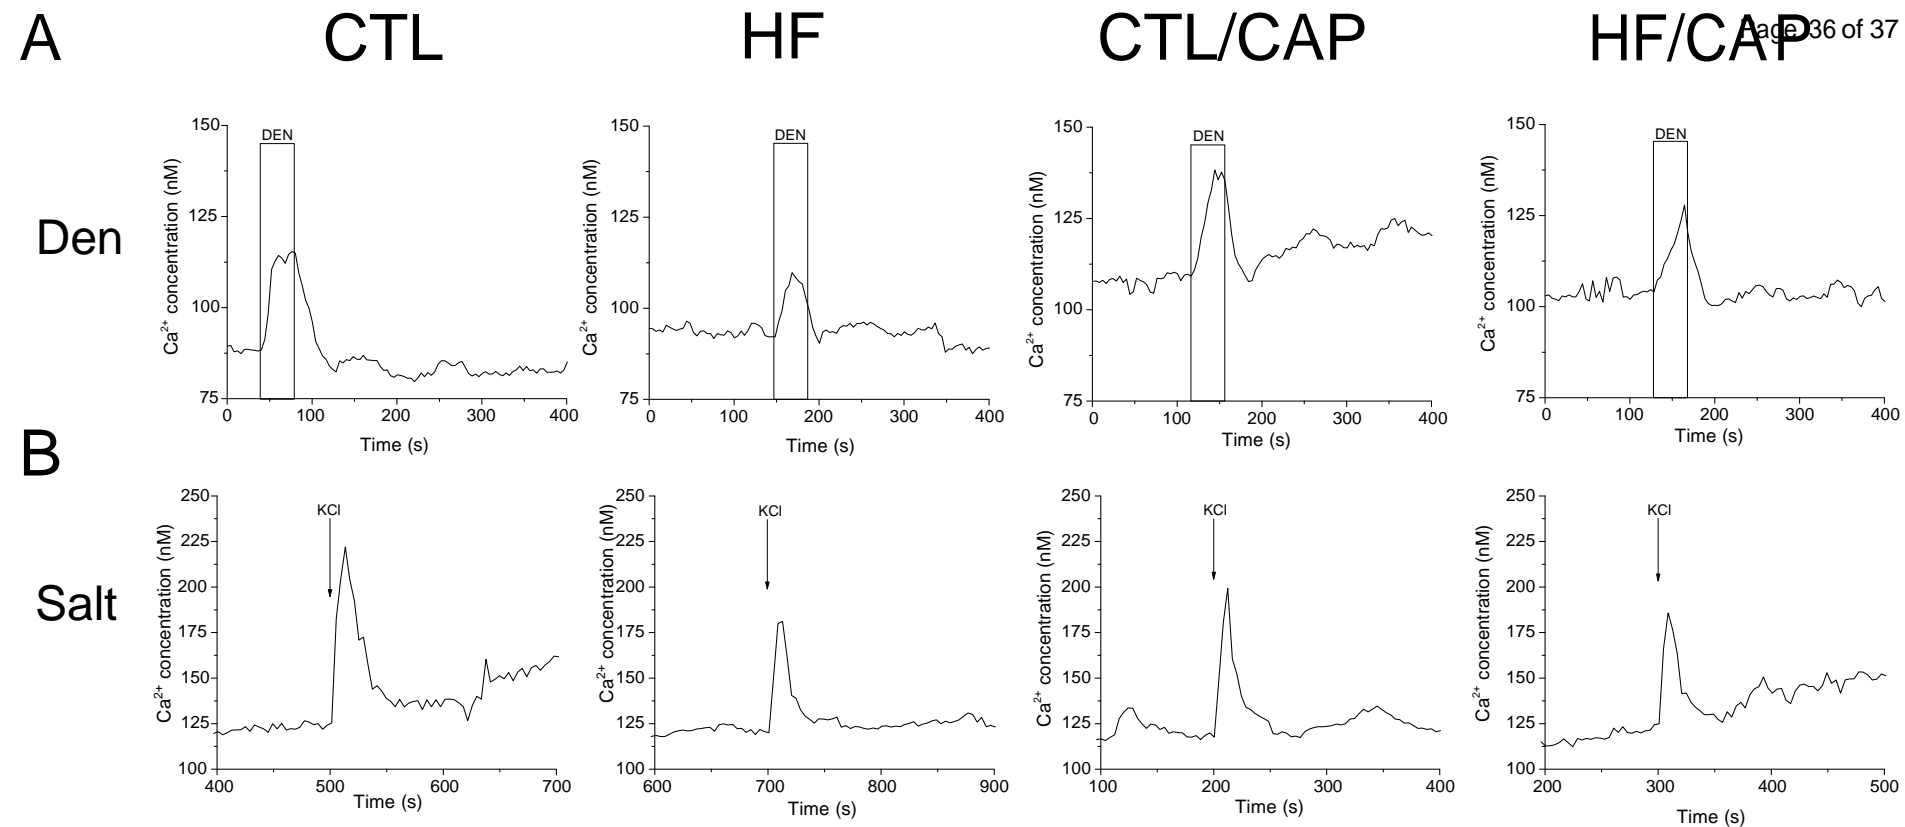

**Figure S3: Effects of diet and weight on bitter and salt stimuli.** Representative traces of TRCs that were stimulated with **(A)** denatonium, or **(B)** 50mM KCl from CTL (first column), HF (second column), CTL/CAP (third column) or HF/CAP (fourth column) mice.

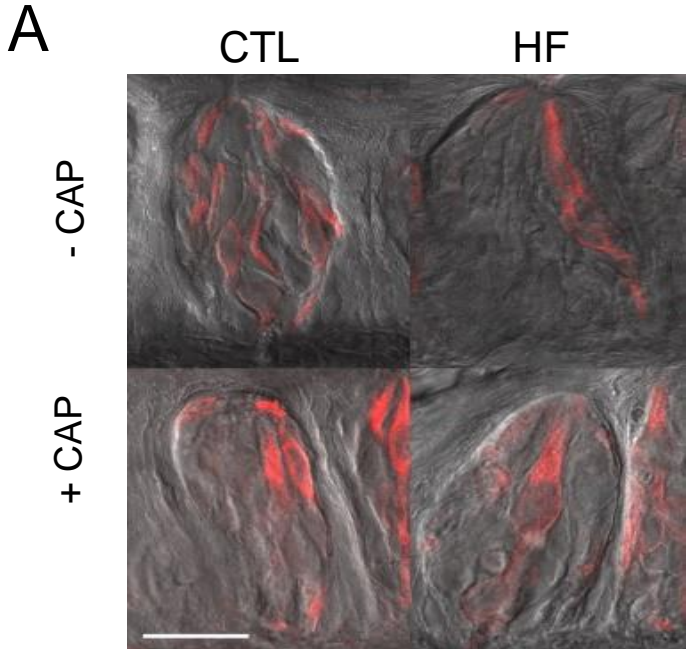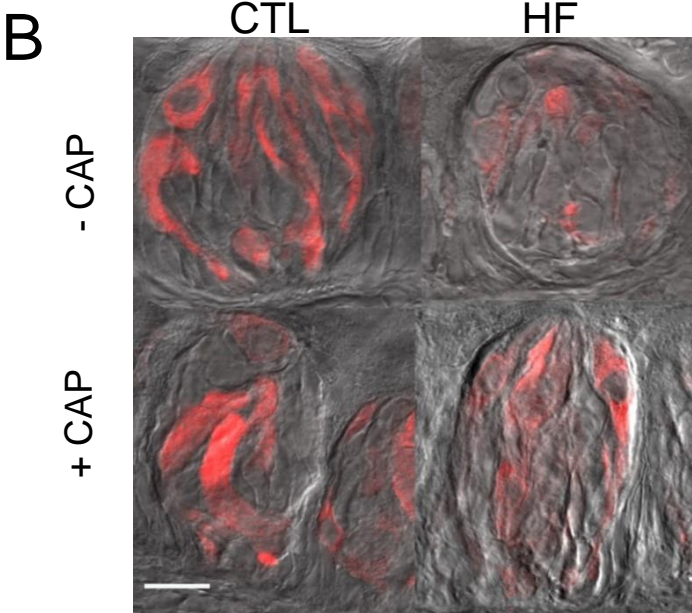

**Figure S4: DIO affects the protein expression of  $\alpha$ -Gustducin and PLC $\beta$ 2 expression.**

**A)** Representative immunohistochemical images of  $\alpha$ -gustducin expression (red) in the CV taste buds of HF+/- CAP and CTL+/- mice. **B)** Representative immunohistochemical images of PLC $\beta$ 2 (red) in CV sections of HF and CTL mice +/- CAP. Scale bars=20 $\mu$ m.
